# Supplementary material
Source: PubMed Central journal article supplement (PMC4578812)

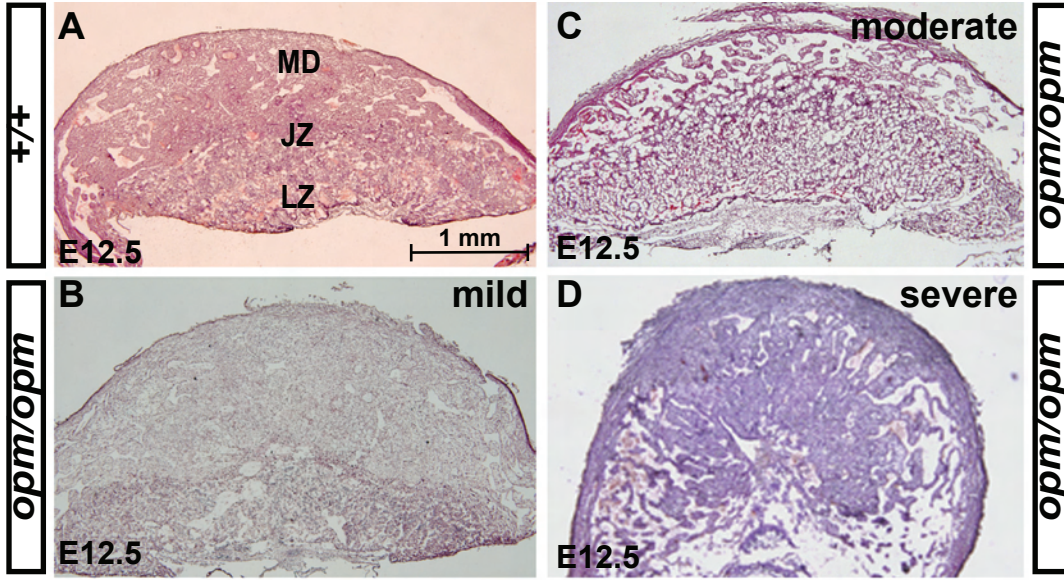

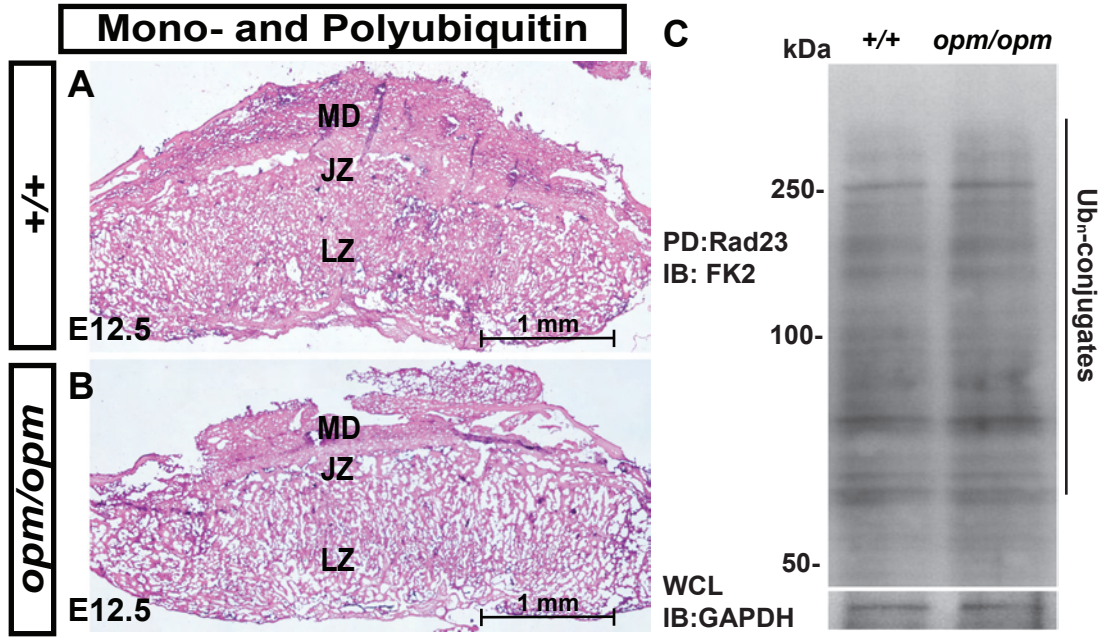

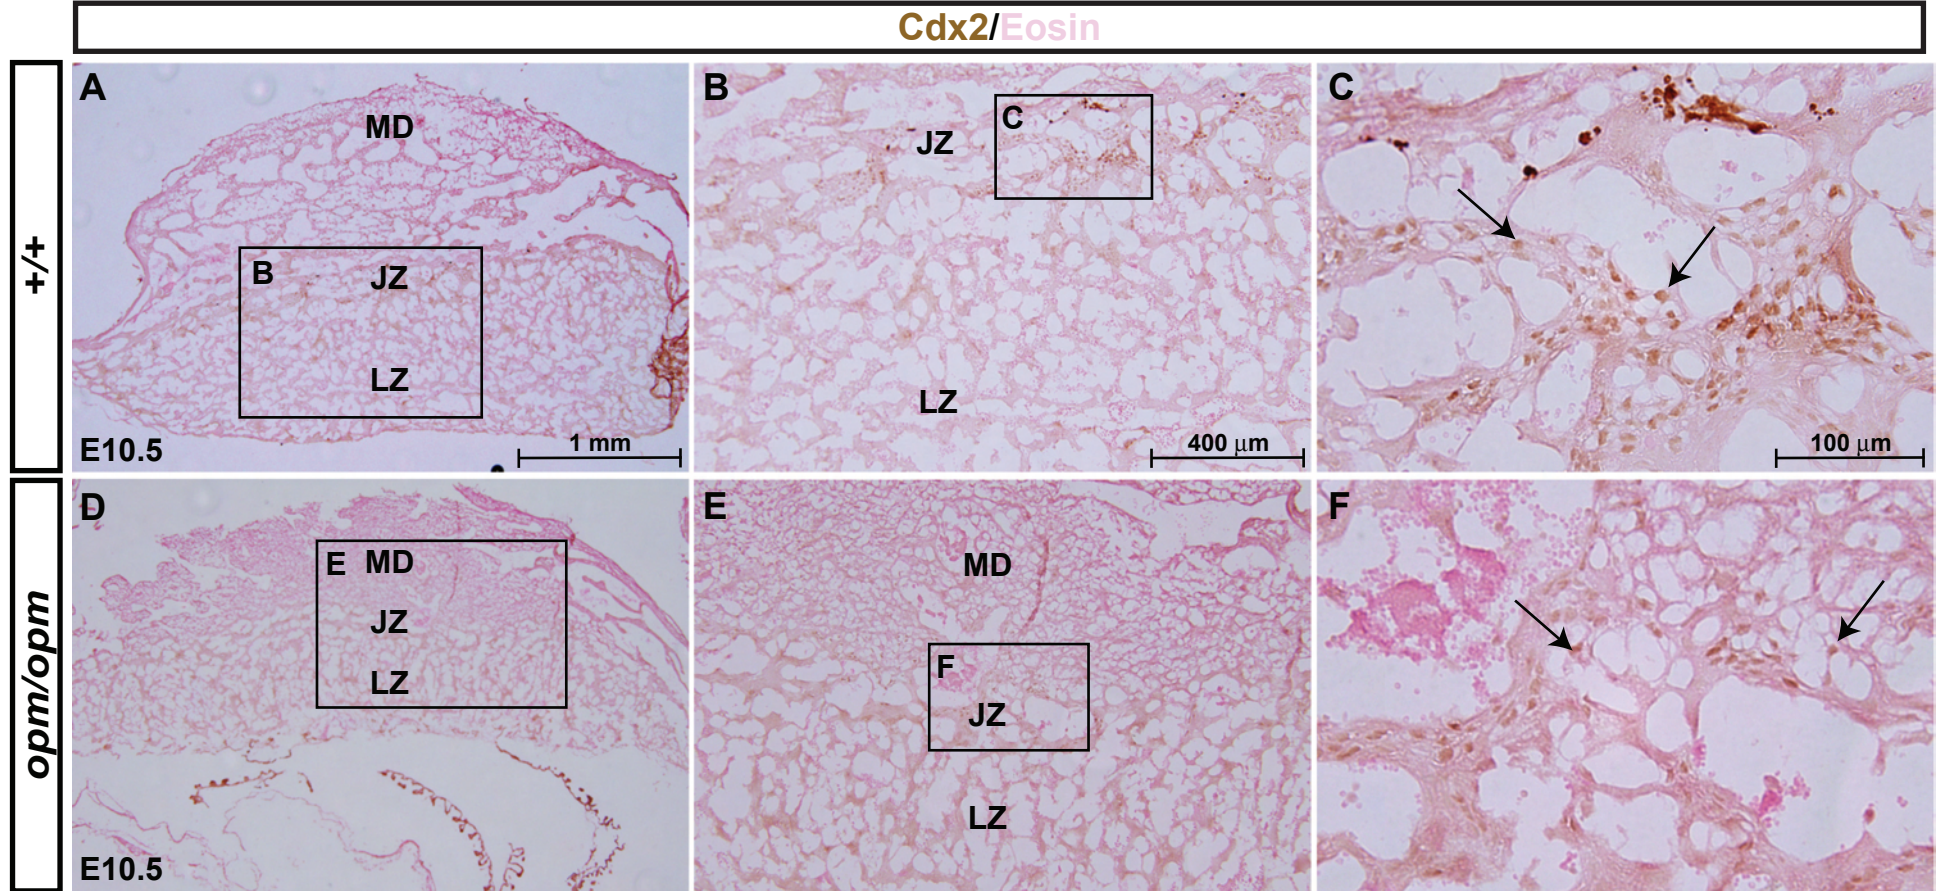

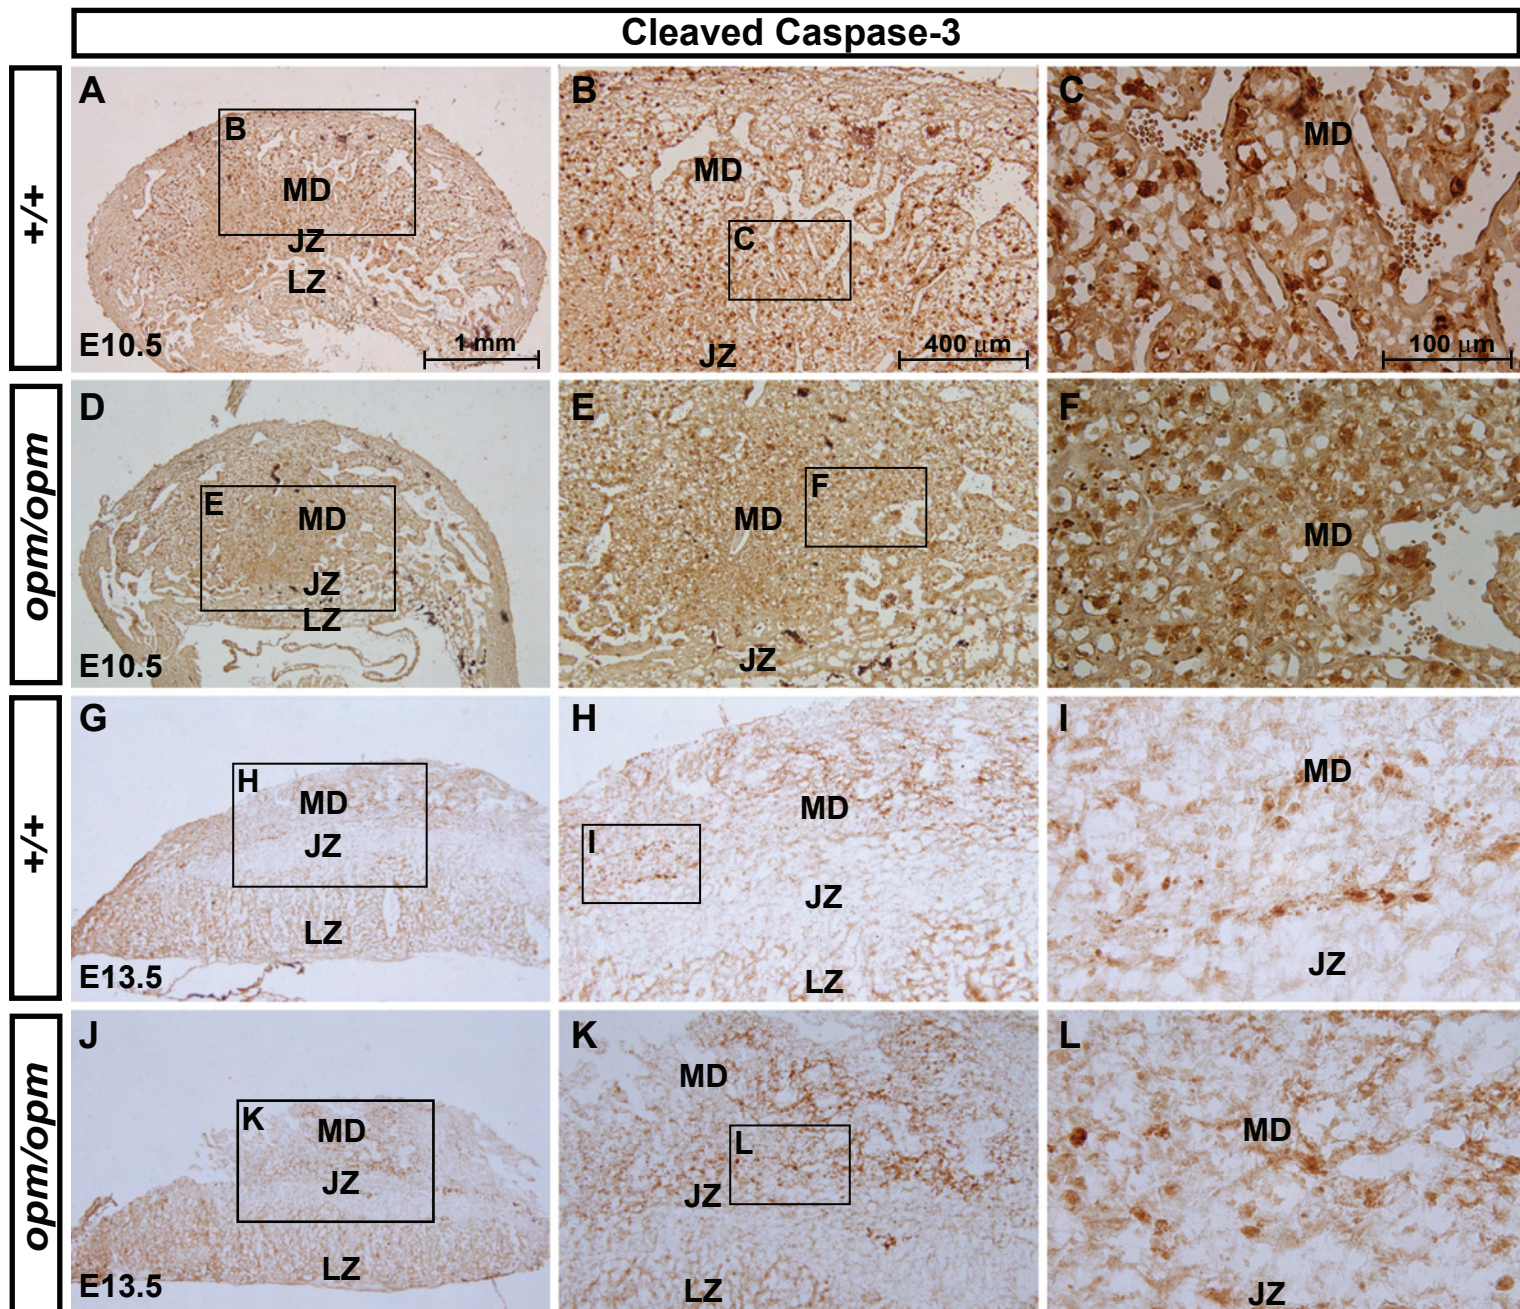

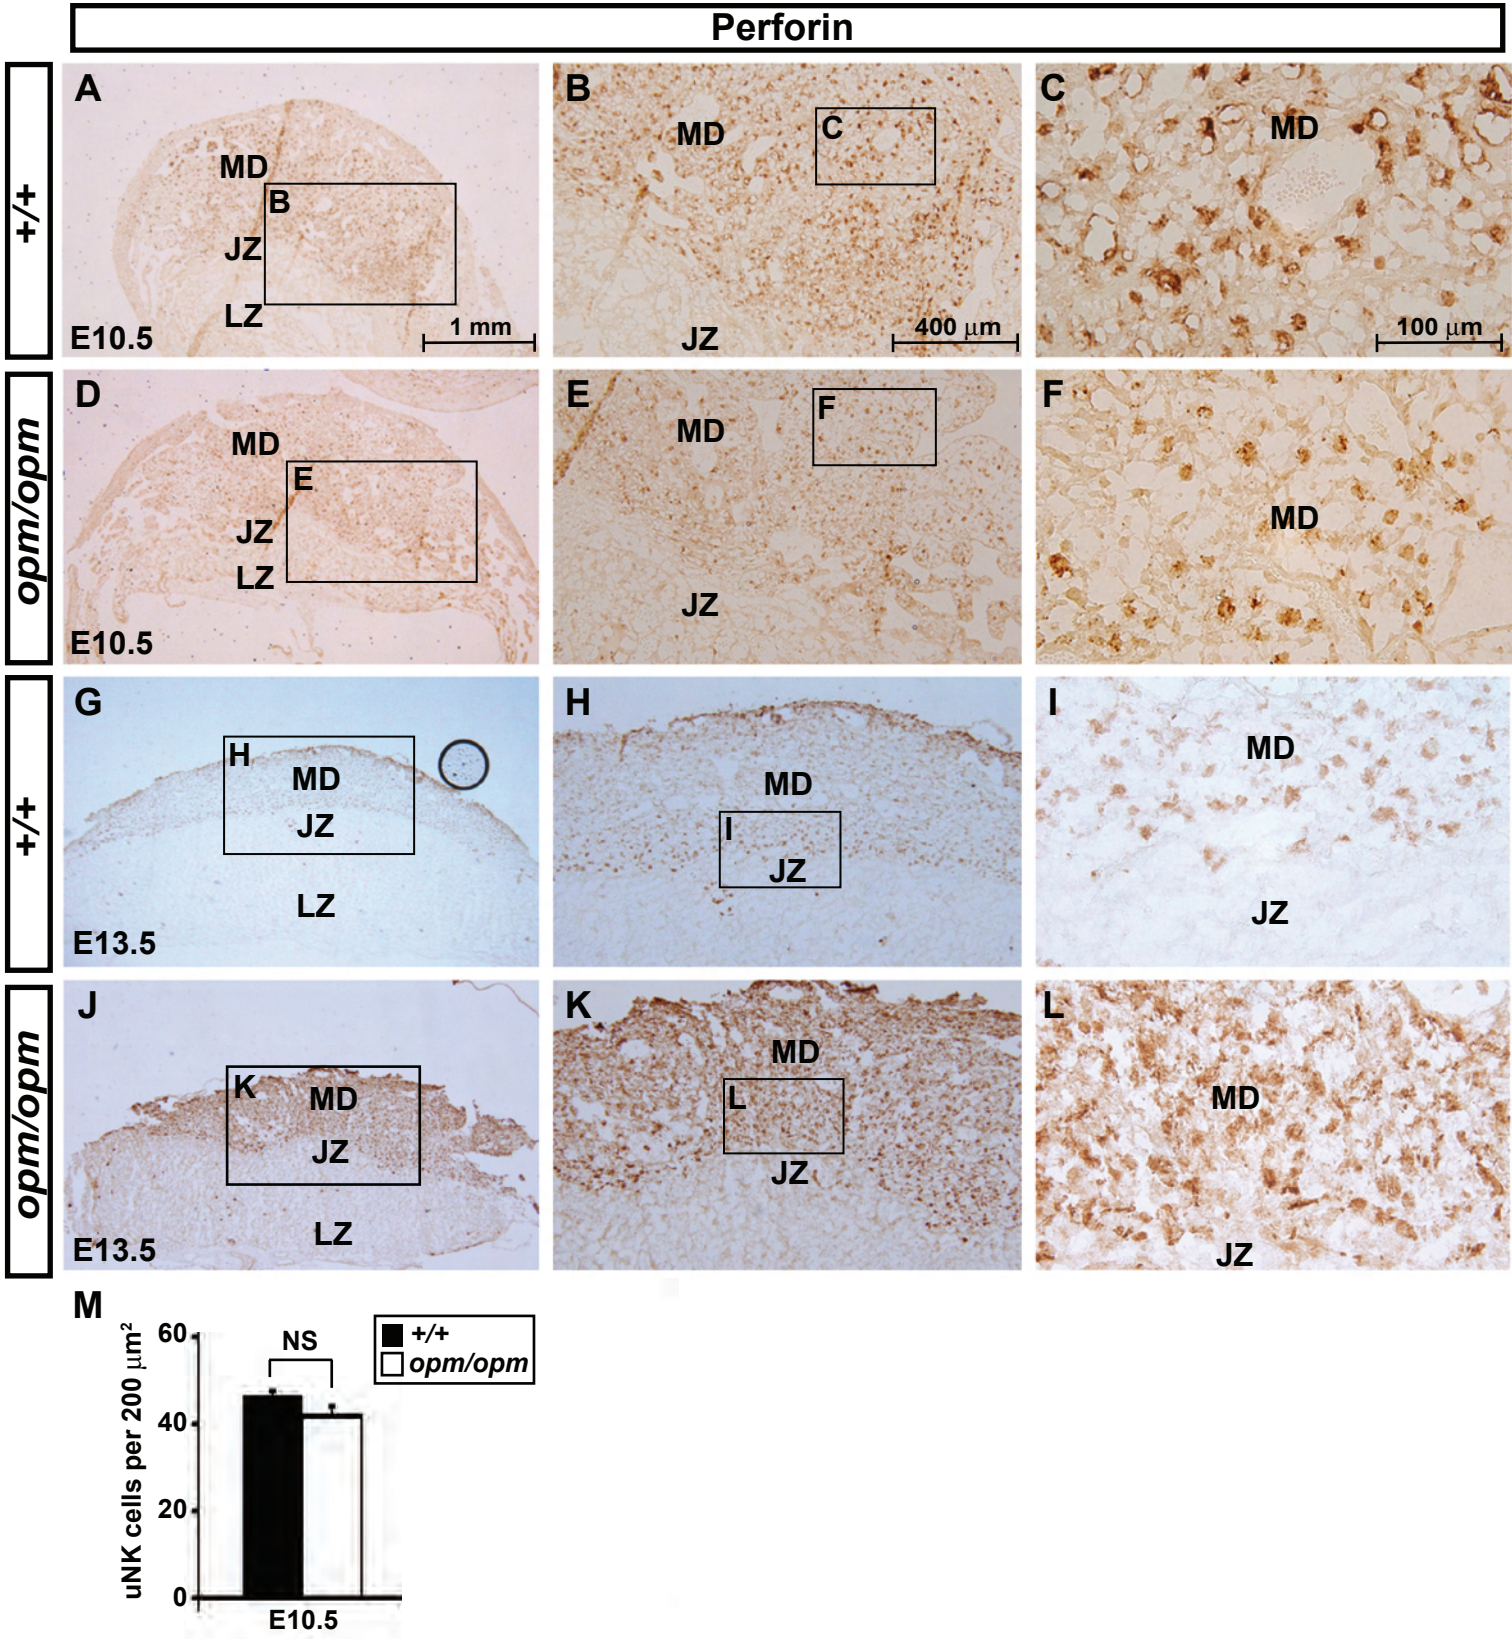

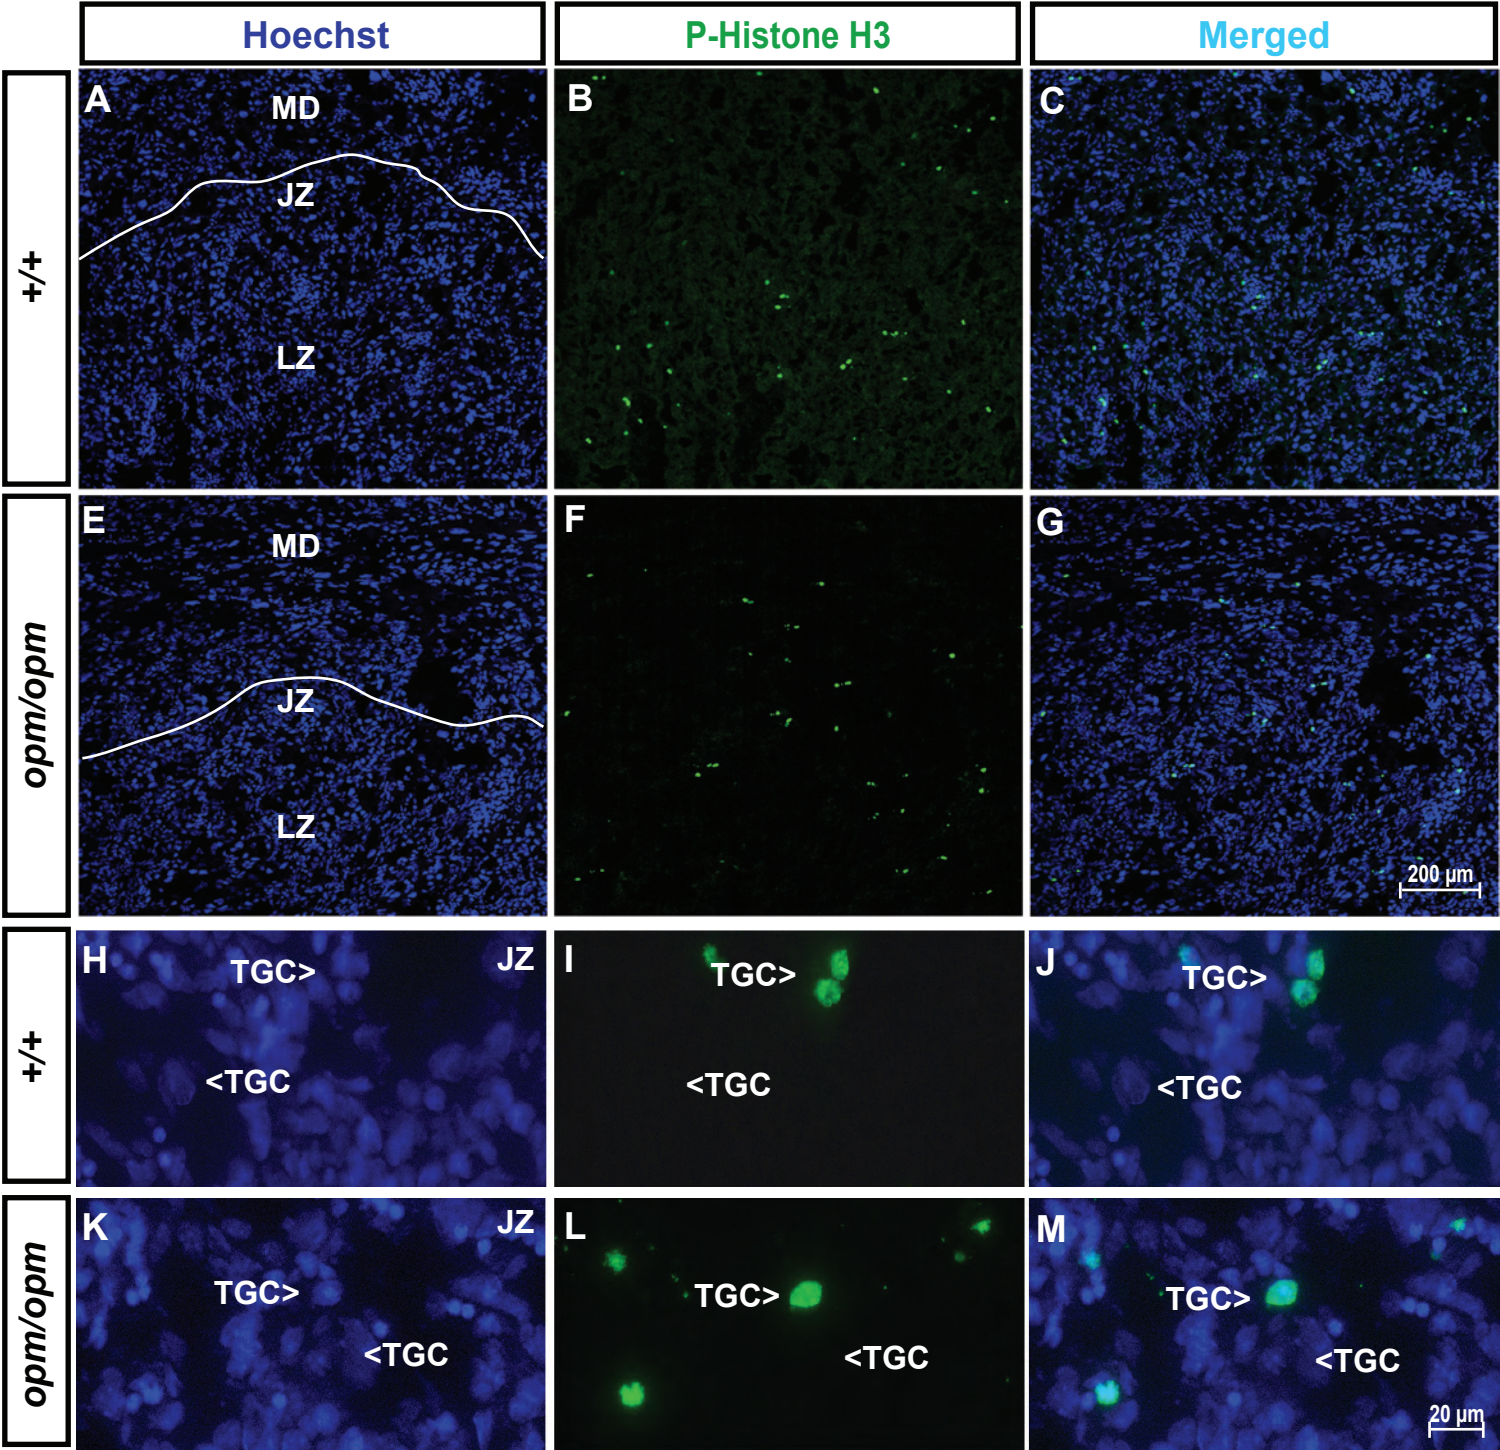

Supplement: NIHMS618321-supplement-01.pdf [file NIHMS618321-supplement-01.pdf]
